# Supplementary material
Source: MDPI journal article supplement (https://www.mdpi.com/2072-4292/15/5/1434)

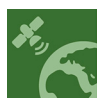

Supplemental Information

Figure S1. Most of the monthly time series used in the study of the Natal Bight.

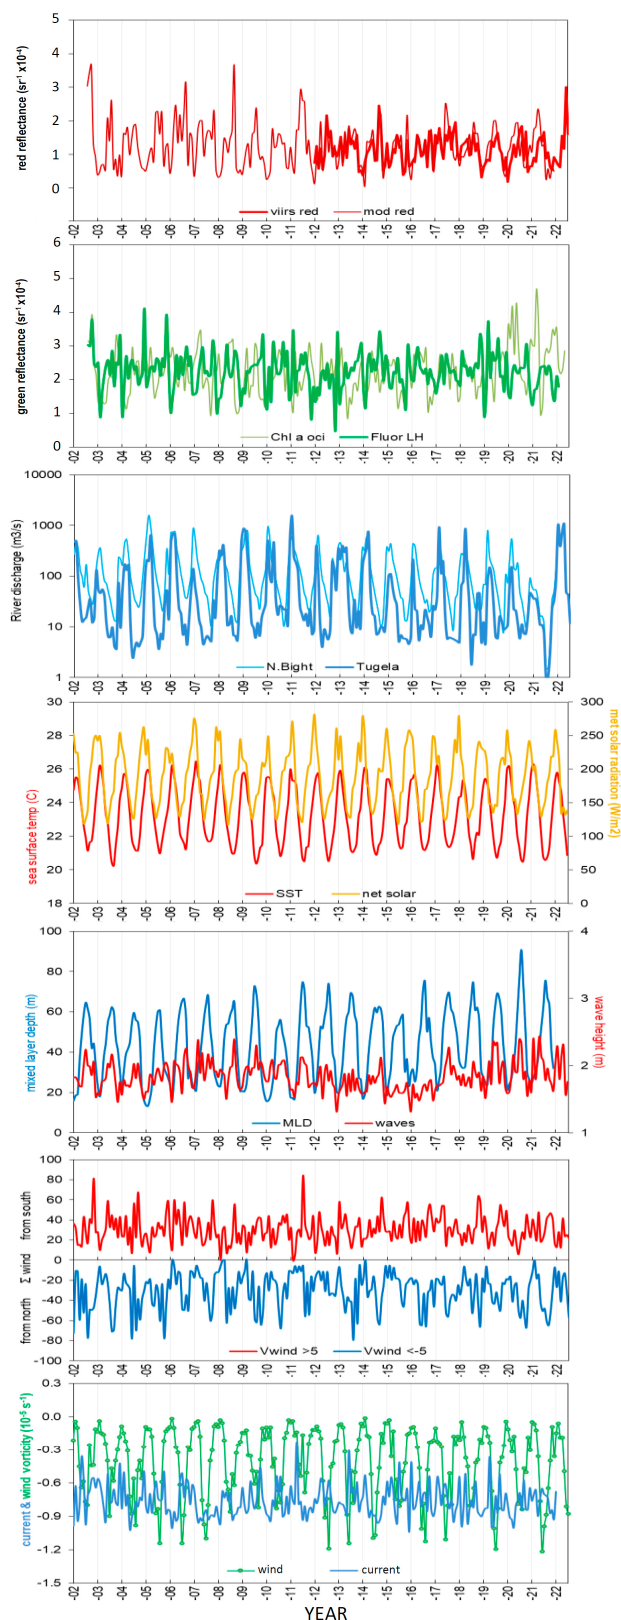

**Figure S2.** MODIS red-band reflectance hovmoller plot on 29.1S 2002–2012 similar to Fig 2a, with Tugela discharge at left. Right are red-band maps for Feb and June 2011. Lower right is sediment transport nomogram adapted from Van Rijn (2007). For June 2011: 2.6 m wave height, 0.3 m/s current gives  $0.3 \text{ kg m}^{-2}/\text{s}$  transport and suspended concentration of  $\sim 1 \text{ kg/m}^3$  for grain sizes  $< 0.1 \text{ mm}$ .

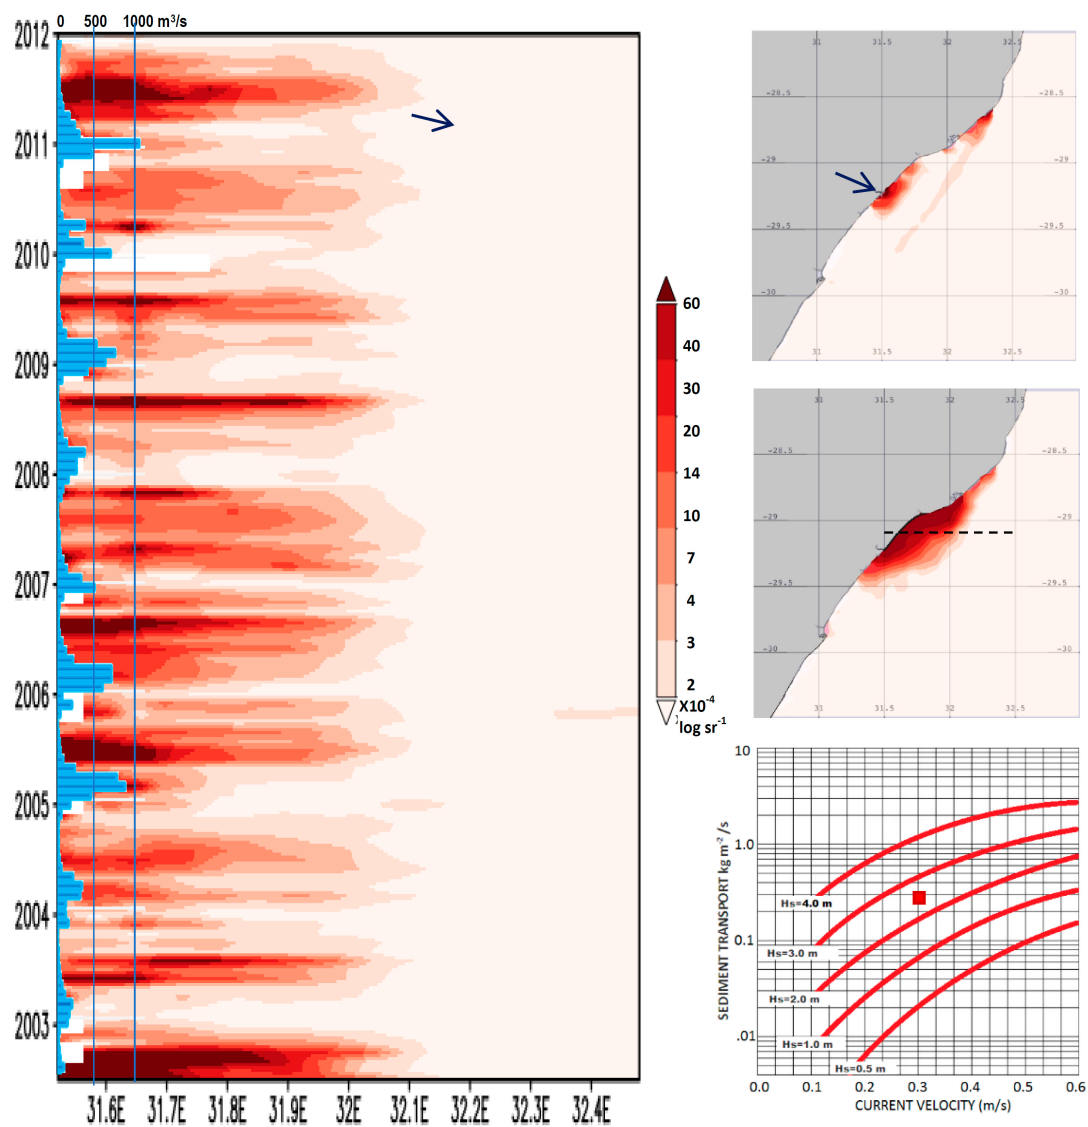

**Figure S3.** Top panel) 2015 time series of daily wind vorticity over the Natal Bight (negative cyclonic, event denoted by square), Middle) map of surface wind event on 12 July, *H* = Mascarene high. Lower) mean diurnal cycles for Jun-Aug 2015 at Tugela, illustrating nocturnal westerlies (270°).

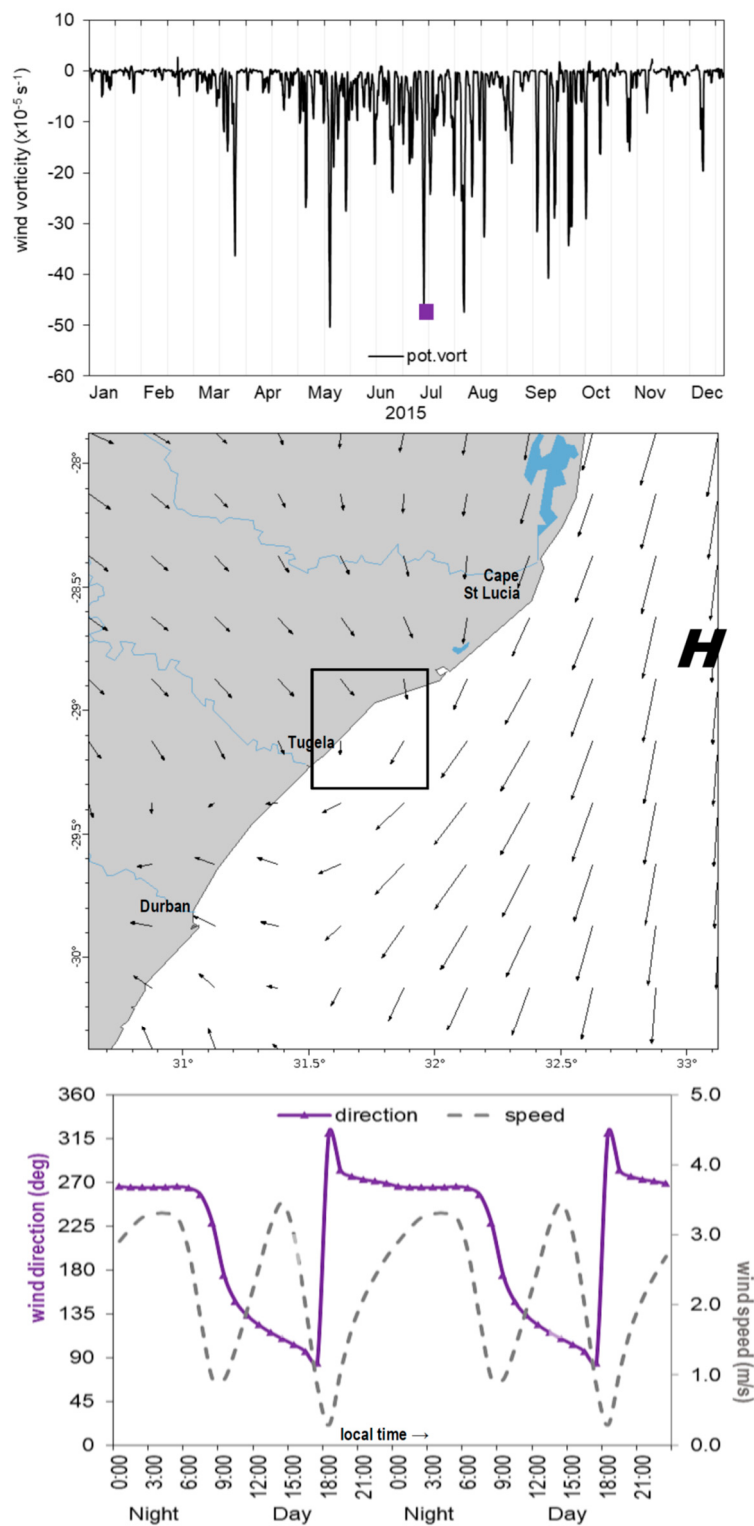

Supplement: s1 [file s1 › remotesensing-2147281-supplementary.pdf]
